# Supplementary material
Source: PubMed Central journal article supplement (PMC3068915)

## FIGURE LEGENDS FOR SUPPLEMENTARY FIGURES

**Figure S1. TCR V $\beta$  usage of CD8<sup>+</sup> T cells in WT, K<sup>b/-</sup>D<sup>b/-</sup> and K<sup>b/-</sup>D<sup>b/-</sup>M3<sup>-/-</sup> mice.** Splenocytes isolated from WT, K<sup>b/-</sup>D<sup>b/-</sup> and K<sup>b/-</sup>D<sup>b/-</sup>M3<sup>-/-</sup> mice were stained with antibodies against TCR $\beta$ , CD8, and indicated TCR V $\beta$  chains. Bar graphs depict mean  $\pm$  SEM for the percentage of TCR $\beta$ <sup>+</sup>CD8<sup>+</sup> cells expressing particular TCR V $\beta$  chains in WT (open bars), K<sup>b/-</sup>D<sup>b/-</sup> (hatched bars) and K<sup>b/-</sup>D<sup>b/-</sup>M3<sup>-/-</sup> (filled bars) mice. Results shown are means from four mice per genotype. \*,  $p < 0.05$ ; \*\*,  $p < 0.01$ ; \*\*\*,  $p < 0.001$ .

**Figure S2. Kinetics of LM-specific CD8<sup>+</sup> T cell responses in K<sup>b/-</sup>D<sup>b/-</sup>M3<sup>-/-</sup> mice.** Splenocytes were harvested from LM-infected K<sup>b/-</sup>D<sup>b/-</sup> and K<sup>b/-</sup>D<sup>b/-</sup>M3<sup>-/-</sup> mice at various time points and stimulated *ex vivo* with HKLM for 7 h. Bar graph depicts mean  $\pm$  SEM for the total number of IFN- $\gamma$ -producing CD8<sup>+</sup> T cells from 9 mice per experimental group. \*,  $p < 0.05$ ; \*\*\*,  $p < 0.001$ .

**Figure S3. LM-specific CD8<sup>+</sup> T cells isolated from LM-infected K<sup>b/-</sup>D<sup>b/-</sup>M3<sup>-/-</sup> mice produce IFN- $\gamma$ .** Splenocytes and hepatic leukocytes were harvested from K<sup>b/-</sup>D<sup>b/-</sup>M3<sup>-/-</sup> mice 7 days post LM infection. Cells were stimulated with HKLM for 7 h and stained with antibodies against CD8 $\beta$  and TCR $\beta$ . Cells were then intracellularly stained for IFN- $\gamma$  and analyzed by flow cytometry. Bar graphs depict the mean  $\pm$  SEM for the percentage of CD8<sup>+</sup>IFN- $\gamma$ <sup>+</sup> cells within the TCR $\beta$ <sup>+</sup> gate. N=13 for untreated splenocytes as well as for HKLM-treated splenocytes.

**Figure S4. LM-specific K<sup>b/-</sup>D<sup>b/-</sup>M3<sup>-/-</sup> CD8<sup>+</sup> T cells are not CD1d-restricted.** Splenocytes were harvested from LM-infected K<sup>b/-</sup>D<sup>b/-</sup> and K<sup>b/-</sup>D<sup>b/-</sup>M3<sup>-/-</sup> mice at 7 days post-infection and enriched for CD8<sup>+</sup> T cells. These T cells were then used as effectors in an IFN- $\gamma$  ELISPOT assay. Uninfected or LM-infected BMDC were used as stimulators and were incubated with CD8<sup>+</sup> T cells in medium alone or in the presence of mAb against CD1d. Results are presented as the mean  $\pm$  SEM of the number of

IFN- $\gamma$  spot-forming units from two pooled animals per genotype and are representative of two independent experiments.

**Figure S5. H2-M3-restricted CD8<sup>+</sup> T cell responses do not protect against secondary LM infection.** K<sup>b/-</sup>D<sup>b/-</sup> and K<sup>b/-</sup>D<sup>b/-</sup>M3<sup>-/-</sup> mice were infected with 2x10<sup>3</sup> CFU of LM, then subsequently rechallenged with 5x10<sup>4</sup> CFU of LM 1 mo following initial infection. Bacterial burden in the liver was determined at three days post secondary infection. Bar graphs depict the mean  $\pm$  SEM for 7 mice per genotype.

**Figure S6. LM-specific K<sup>b/-</sup>D<sup>b/-</sup>M3<sup>-/-</sup> CD8<sup>+</sup> T cells do not lyse Qa-1<sup>b</sup>-expressing cells.** Splenocytes were isolated from K<sup>b/-</sup>D<sup>b/-</sup>M3<sup>-/-</sup> mice 7 days post LM infection, enriched for CD8<sup>+</sup> T cells, and activated with ConA. After 3 days of ConA stimulation, splenocytes were used as effectors in a <sup>51</sup>Cr release CTL assay at an effector:target cell ratio of 30:1. Uninfected or LM-infected J774 cells, HeLa cells, or HeLa Qa-1<sup>b</sup>-transfectants were labeled with <sup>51</sup>Cr and used as targets. Graph depicts the mean  $\pm$  SEM for the percentage of LM-specific killing pooling two mice per genotype. Data are representative of two independent experiments.

Figure S1.

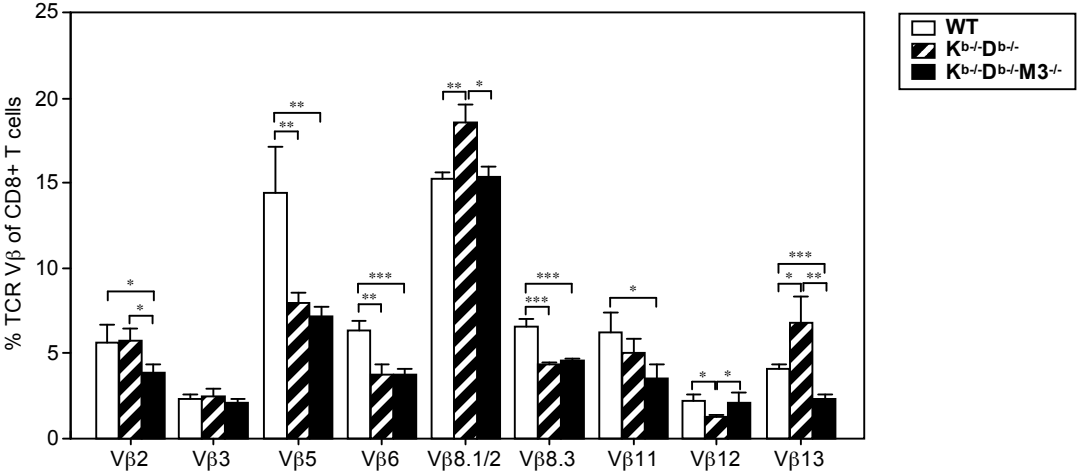

Figure S2.

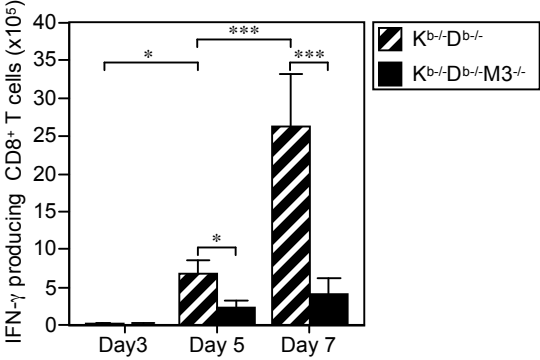

Figure S3.

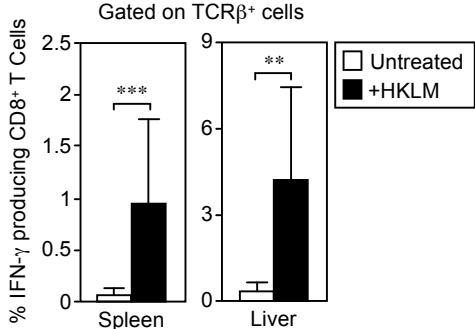

Figure S4.

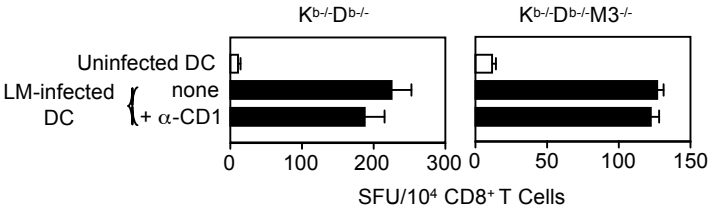

Figure S5.

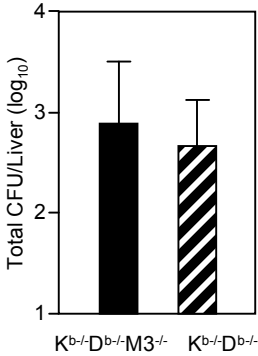

Figure S6.

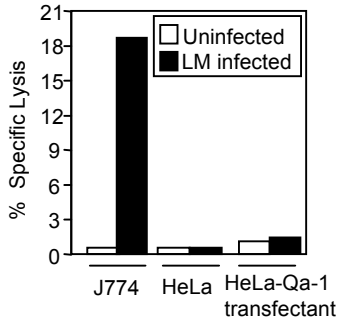

Supplement: NIHMS280059-supplement-supplement_1.pdf [file NIHMS280059-supplement-supplement_1.pdf]
